# Supplementary material for: Modulation of π character upon complexation captured by molecular rotation spectra
Source: Royal Society of Chemistry journal article supplement (doi:10.1039/d2cp01321e), 2022-01-01
Supplement: d2cp01321e1.pdf [file d2cp01321e1.pdf]

Supplementary Information for

Modulation of  $\pi$  character upon complexation captured by  
molecular rotation spectra

Yang Zheng,<sup>a,b</sup> Qin Yang,<sup>b</sup> Sven Herbers,<sup>c</sup> Wanying Cheng,<sup>a</sup> Zhongming Jiang,<sup>b</sup> Hao  
Wang,<sup>a</sup> Xuefang Xu,<sup>a</sup> Julien Bloino<sup>\*b</sup> and Qian Gou<sup>\*a,d</sup>

<sup>a</sup> *School of Chemistry and Chemical Engineering, Chongqing University, 401331  
Chongqing, China*

<sup>b</sup> *Scuola Normale Superiore di Pisa, Piazza dei Cavalieri 7, 56125 Pisa, Italy*

<sup>c</sup> *Institute for Molecules and Materials, Radboud University, Heijendaalseweg 135, NL-  
6525 AJ Nijmegen, Netherlands*

<sup>d</sup> *Chongqing Key Laboratory of Theoretical and Computational Chemistry, Chongqing  
University, 401331 Chongqing, China*

\* Julien Bloino: [julien.bloino@sns.it](mailto:julien.bloino@sns.it)

\* Qian Gou: [qian.gou@cqu.edu.cn](mailto:qian.gou@cqu.edu.cn);

## Table of Contents

1. Equilibrium spectroscopic constants of the nine isomers of furan-CF<sub>3</sub>Cl at the rDSDPBEP86-GD3(BJ)/jun-cc- pVTZ level of theory (Table S1)
2. Equilibrium geometries of the two observed isomers of furan-CF<sub>3</sub>Cl (Table S2)
3. Relative intensity measurements of the two observed isomers of furan-CF<sub>3</sub>Cl in Helium (Table S3)
4. Experimental spectroscopic constants of the two observed isomers of furan-CF<sub>3</sub>Cl (Table S4)
5. Experimental measured transition frequencies of the observed isomers of furan-CF<sub>3</sub>Cl (Table S5-S9)
6. NBO results of the observed isomers of furan-CF<sub>3</sub>Cl (Table S10)

**1. Table S1. Equilibrium spectroscopic parameters of the nine isomers of furan–CF<sub>3</sub>Cl calculated at the rDSD-PBEP86-D3(BJ)/jun-cc-pVTZ level of theory.**

|                                                | I              | II             | III            | IV             | V              |
|------------------------------------------------|----------------|----------------|----------------|----------------|----------------|
| $A_e, B_e, C_e$ [MHz]                          | 2241, 642, 618 | 2083, 659, 620 | 2511, 465, 463 | 2553, 448, 447 | 2099, 656, 601 |
| $\chi_{aa}$ [MHz]                              | 8.68           | 9.69           | -65.06         | -64.61         | 36.02          |
| $(\chi_{bb}-\chi_{cc})$ [MHz]                  | -81.76         | -82.90         | -9.01          | -9.34          | -105.62        |
| $ \chi_{ab} $ [MHz]                            | 48.74          | 48.28          | 30.49          | 31.10          | 10.25          |
| $ \mu_a ,  \mu_b ,  \mu_c $ [D]                | 0.8, 0.8, 0.0  | 0.2, 0.3, 0.0  | 0.9, 0.5, 0.5  | 0.9, 0.6, 0.0  | 0.5, 0.1, 0.4  |
| $\Delta E, \Delta E_0$ [kJ mol <sup>-1</sup> ] | 0, 0           | 0.28, 0.17     | 0.76, 0.40     | 1.80, 1.26     | 1.63, 1.53     |

  

|                                                | VI             | VII            | VIII           | IX             |
|------------------------------------------------|----------------|----------------|----------------|----------------|
| $A_e, B_e, C_e$ [MHz]                          | 1966, 672, 617 | 1985, 663, 615 | 2710, 546, 541 | 2524, 556, 553 |
| $\chi_{aa}$ [MHz]                              | 37.16          | 34.25          | -63.48         | -63.50         |
| $(\chi_{bb}-\chi_{cc})$ [MHz]                  | -109.82        | -106.69        | 9.50           | -8.60          |
| $ \chi_{ab} $ [MHz]                            | 1.16           | 17.13          | 0.0            | 30.19          |
| $ \mu_a ,  \mu_b ,  \mu_c $ [D]                | 0.0, 1.0, 0.2  | 0.0, 0.3, 0.6  | 0.1, 0.0, 0.7  | 0.3, 0.4, 0.4  |
| $\Delta E, \Delta E_0$ [kJ mol <sup>-1</sup> ] | 1.77, 1.58     | 1.88, 1.72     | 2.71, 2.47     | 2.92, 2.64     |

**2. Table S2. Equilibrium geometries of the two observed isomers of furan–CF<sub>3</sub>Cl.**

| Isomers                                                                                        | Cartesian coordinates (Å) |    |           |           |           |
|------------------------------------------------------------------------------------------------|---------------------------|----|-----------|-----------|-----------|
| <p>I</p> 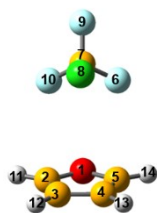   | 1                         | O  | 1.584038  | 1.071822  | -0.000080 |
|                                                                                                | 2                         | C  | 2.111918  | 0.453411  | -1.093408 |
|                                                                                                | 3                         | C  | 2.961299  | -0.538373 | -0.717583 |
|                                                                                                | 4                         | C  | 2.961182  | -0.538336 | 0.717730  |
|                                                                                                | 5                         | C  | 2.111825  | 0.453540  | 1.093366  |
|                                                                                                | 6                         | F  | -1.393831 | 0.867135  | 1.078213  |
|                                                                                                | 7                         | C  | -1.688612 | 0.153587  | 0.000000  |
|                                                                                                | 8                         | Cl | -0.790872 | -1.358641 | -0.000010 |
|                                                                                                | 9                         | F  | -2.994966 | -0.087901 | 0.000040  |
|                                                                                                | 10                        | F  | -1.393891 | 0.867115  | -1.078241 |
|                                                                                                | 11                        | H  | 1.786899  | 0.830310  | -2.047880 |
|                                                                                                | 12                        | H  | 3.516722  | -1.186447 | -1.375585 |
|                                                                                                | 13                        | H  | 3.516503  | -1.186373 | 1.375856  |
|                                                                                                | 14                        | H  | 1.786722  | 0.830549  | 2.047765  |
| <p>III</p>  | 1                         | O  | -2.703414 | -0.821666 | -0.843165 |
|                                                                                                | 2                         | C  | -2.756387 | 0.532503  | -0.977699 |
|                                                                                                | 3                         | C  | -2.880740 | 1.129139  | 0.237952  |
|                                                                                                | 4                         | C  | -2.907276 | 0.065307  | 1.200965  |
|                                                                                                | 5                         | C  | -2.795823 | -1.087354 | 0.489904  |
|                                                                                                | 6                         | Cl | 0.474079  | 0.446666  | -0.030024 |
|                                                                                                | 7                         | C  | 2.158057  | -0.054090 | 0.013918  |
|                                                                                                | 8                         | F  | 2.638448  | -0.176821 | -1.217808 |
|                                                                                                | 9                         | F  | 2.277626  | -1.223945 | 0.630651  |
|                                                                                                | 10                        | F  | 2.892009  | 0.841277  | 0.664426  |
|                                                                                                | 11                        | H  | -2.696964 | 0.907518  | -1.985016 |
|                                                                                                | 12                        | H  | -2.947057 | 2.188481  | 0.425173  |
|                                                                                                | 13                        | H  | -2.993445 | 0.149359  | 2.271822  |
|                                                                                                | 14                        | H  | -2.765510 | -2.127718 | 0.764263  |

**3. Table S3. Relative intensity measurements in arbitrary units of the two observed isomers of furan–CF<sub>3</sub>Cl in Helium.**

| Transitions                          | Isomers | Frequencies/MHz | Intensities |
|--------------------------------------|---------|-----------------|-------------|
| 8 <sub>17</sub> ←7 <sub>16</sub>     | I       | 9964.837        | 0.013       |
|                                      | III     | 7258.676        | 0.008       |
| 8 <sub>18</sub> ←7 <sub>17</sub>     | I       | 9782.272        | 0.019       |
|                                      | III     | 7243.972        | 0.0063      |
| 9 <sub>18</sub> ←8 <sub>17</sub>     | I       | 11208.52        | 0.0089      |
|                                      | III     | 8165.74         | 0.0048      |
| 9 <sub>19</sub> ←8 <sub>18</sub>     | I       | 11003.39        | 0.0058      |
|                                      | III     | 8149.219        | 0.0049      |
| 10 <sub>19</sub> ←9 <sub>18</sub>    | I       | 12451.46        | 0.0048      |
|                                      | III     | 9072.751        | 0.0055      |
| 10 <sub>110</sub> ←9 <sub>19</sub>   | I       | 12223.97        | 0.0031      |
|                                      | III     | 9054.416        | 0.0041      |
| 11 <sub>110</sub> ←10 <sub>19</sub>  | I       | 13693.55        | 0.0052      |
|                                      | III     | 9979.705        | 0.0053      |
| 11 <sub>111</sub> ←10 <sub>110</sub> | I       | 13443.98        | 0.0031      |
|                                      | III     | 9959.578        | 0.0028      |
| 12 <sub>112</sub> ←11 <sub>111</sub> | I       | 14663.39        | 0.0031      |
|                                      | III     | 10864.67        | 0.0021      |
| 12 <sub>111</sub> ←11 <sub>110</sub> | I       | 14934.67        | 0.0015      |
|                                      | III     | 10886.58        | 0.0028      |

The measured intensities were used to evaluate the experimental ratio of relative abundance of the two observed isomers according to the following expression:

$$\frac{N_1}{N_2} = (I_I \mu_{a,III} \gamma_{III} \nu_{III}^2 \omega_{III}) / (I_{III} \mu_{a,I} \gamma_I \nu_I^2 \omega_I)$$

where  $I$  denotes the experimental peak intensity,  $\mu_a$  denotes the value of dipole moment along principal  $a$ -axis,  $\gamma$  represents the predicted line strength,  $\nu$  represents the frequency of the corresponding transition, and  $\omega$  is the conformational degeneracy.

**4. Table S4. Experimental spectroscopic parameters of the two observed isomers of furan–CF<sub>3</sub>Cl.**

|                                                               | Isomer I                |                  |                      |           | Isomer III                    |                     |
|---------------------------------------------------------------|-------------------------|------------------|----------------------|-----------|-------------------------------|---------------------|
|                                                               | <sup>35</sup> Cl        | <sup>37</sup> Cl | C $\alpha$           | C $\beta$ | C <sub>CF<sub>3</sub>Cl</sub> | <sup>35</sup> Cl    |
| <i>A</i> [MHz]                                                | 2248.91(1) <sup>a</sup> | 2213.61(1)       | 2235.4(1)            | 2241.1(2) | 2248.7(2)                     | [2447] <sup>b</sup> |
| <i>B</i> [MHz]                                                | 628.91(1)               | 627.92(1)        | 624.48(1)            | 621.70(1) | 626.64(1)                     | 454.14(1)           |
| <i>C</i> [MHz]                                                | 606.00(1)               | 602.48(1)        | 602.59(1)            | 599.45(1) | 603.88(1)                     | 452.29(1)           |
| $\chi_{aa}$ [MHz]                                             | 9.66(1)                 | 7.91(1)          | [9.663] <sup>c</sup> | [9.663]   | [9.663]                       | -71.5 (5)           |
| ( $\chi_{bb}$ - $\chi_{cc}$ ) [MHz]                           | -86.06(1)               | -68.14(1)        | [-86.056]            | [-86.056] | [-86.056]                     | --                  |
| $ \chi_{ab} $ [MHz]                                           | 50.89(3)                | 39.93(2)         | [50.89]              | [50.89]   | [50.89]                       | --                  |
| <i>D<sub>J</sub></i> [kHz]                                    | 0.44(1)                 | [0.4393]         | [0.4393]             | [0.4393]  | [0.4393]                      | 0.27(1)             |
| <i>D<sub>JK</sub></i> [kHz]                                   | -0.18(1)                | [-0.190]         | [-0.190]             | [-0.190]  | [-0.190]                      | -15.2(1)            |
| <i>D<sub>K</sub></i> [kHz]                                    | 1.94(1)                 | [1.92]           | [1.92]               | [1.92]    | [1.92]                        | --                  |
| <i>d<sub>1</sub></i> [kHz]                                    | -0.031(1)               | [-0.0312]        | [-0.0312]            | [-0.0312] | [-0.0312]                     | -0.019(1)           |
| <i>d<sub>2</sub></i> [kHz]                                    | 0.0037(1)               | [0.0035]         | [0.0035]             | [0.0035]  | [0.0035]                      | --                  |
| $\sigma^d$ [kHz]                                              | 3.5                     | 3.9              | 2.0                  | 3.7       | 3.3                           | 6.0                 |
| <i>N<sub>transitions</sub>/N<sub>lines</sub></i> <sup>e</sup> | 88/350                  | 54/215           | 11/43                | 11/43     | 9/28                          | 25/100              |

<sup>a</sup> Uncertainties (in parentheses) are 1 $\sigma$  uncertainties expressed in units of the last digit. <sup>b</sup> The value of rotational constant *A* for isomer III was fixed at the calculated value which is based on the deviation pattern (0.7%) of isomer I (see the main text). <sup>c</sup> Values fixed at the normal species. <sup>d</sup> Root mean square deviation of the fit. <sup>e</sup> Number of transitions/lines in the fit.

## 5. Measured transition frequencies of the observed isomers of furan-CF<sub>3</sub>Cl.

**Table S5.** Experimental transition frequencies ( $\nu_{\text{obs}}$ , MHz) and observed minus calculated values ( $\Delta\nu$ , kHz) of isomer I of furan-CF<sub>3</sub><sup>35</sup>Cl and furan-CF<sub>3</sub><sup>37</sup>Cl.

| Isomer I <sup>35</sup> Cl |        |        |       |         |         |          |            |                               |                        | Isomer I <sup>37</sup> Cl     |                        |
|---------------------------|--------|--------|-------|---------|---------|----------|------------|-------------------------------|------------------------|-------------------------------|------------------------|
| $J'$                      | $K_a'$ | $K_c'$ | $J''$ | $K_a''$ | $K_c''$ | $F'+1/2$ | $F'''+1/2$ | $\nu_{\text{obs}}/\text{MHz}$ | $\Delta\nu/\text{kHz}$ | $\nu_{\text{obs}}/\text{MHz}$ | $\Delta\nu/\text{kHz}$ |
| 5                         | 0      | 5      | 4     | 0       | 4       | 7        | 6          | 6169.5998                     | 0.0                    |                               |                        |
|                           |        |        |       |         |         | 6        | 5          | 6169.1352                     | 3.3                    |                               |                        |
|                           |        |        |       |         |         | 5        | 4          | 6169.4301                     | 0.8                    |                               |                        |
|                           |        |        |       |         |         | 4        | 3          | 6169.6831                     | -3.3                   |                               |                        |
| 5                         | 1      | 5      | 4     | 1       | 4       | 7        | 6          | 6116.1842                     | 0.9                    |                               |                        |
|                           |        |        |       |         |         | 6        | 5          | 6116.8971                     | -4.6                   |                               |                        |
|                           |        |        |       |         |         | 5        | 4          | 6115.7712                     | -3.6                   |                               |                        |
|                           |        |        |       |         |         | 4        | 3          | 6116.8451                     | 0.0                    |                               |                        |
| 5                         | 2      | 4      | 4     | 2       | 3       | 7        | 6          | 6173.4664                     | 2.9                    |                               |                        |
|                           |        |        |       |         |         | 6        | 5          | 6173.9923                     | 4.5                    |                               |                        |
|                           |        |        |       |         |         | 5        | 4          | 6173.7761                     | 1.6                    |                               |                        |
|                           |        |        |       |         |         | 4        | 3          | 6173.5130                     | -0.4                   |                               |                        |
| 5                         | 2      | 3      | 4     | 2       | 2       | 7        | 6          | 6178.2695                     | 0.3                    |                               |                        |
|                           |        |        |       |         |         | 6        | 5          | 6179.0428                     | -1.6                   |                               |                        |
|                           |        |        |       |         |         | 5        | 4          | 6178.9746                     | 10.6                   |                               |                        |
|                           |        |        |       |         |         | 4        | 3          | 6178.1182                     | 3.9                    |                               |                        |
| 6                         | 0      | 6      | 5     | 0       | 5       | 8        | 7          | 7400.7985                     | -0.9                   | 7371.5427                     | -3.3                   |
|                           |        |        |       |         |         | 7        | 6          | 7400.4997                     | 1.8                    | 7371.2622                     | 0.9                    |
|                           |        |        |       |         |         | 6        | 5          | 7400.5342                     | -1.3                   | 7371.2994                     | -1.4                   |
|                           |        |        |       |         |         | 5        | 4          | 7401.1788                     | -1.0                   |                               |                        |
| 6                         | 1      | 6      | 5     | 1       | 5       | 8        | 7          | 7338.6130                     | -2.1                   | 7303.4398                     | -7.2                   |
|                           |        |        |       |         |         | 7        | 6          | 7338.5497                     | 0.1                    | 7303.3872                     | -4.9                   |
|                           |        |        |       |         |         | 6        | 5          | 7338.1795                     | 0.4                    | 7303.0862                     | -10.3                  |
|                           |        |        |       |         |         | 5        | 4          | 7338.1795                     | -3.0                   | 7303.1250                     | 8.6                    |
| 6                         | 1      | 5      | 5     | 1       | 4       | 8        | 7          | 7475.6081                     | -1.2                   | 7455.6363                     | -1.1                   |
|                           |        |        |       |         |         | 7        | 6          | 7475.5370                     | -2.9                   | 7455.5740                     | -2.0                   |
|                           |        |        |       |         |         | 6        | 5          | 7476.1490                     | -3.9                   | 7456.0602                     | -0.9                   |
|                           |        |        |       |         |         | 5        | 4          | 7476.1703                     | 1.9                    | 7456.0887                     | -2.8                   |
| 6                         | 2      | 5      | 5     | 2       | 4       | 8        | 7          | 7407.9024                     | -0.3                   | 7380.5474                     | -3.8                   |
|                           |        |        |       |         |         | 7        | 6          | 7408.0250                     | -3.5                   | 7380.6445                     | -13.8                  |
|                           |        |        |       |         |         | 6        | 5          | 7408.1356                     | 4.7                    | 7380.7264                     | -3.3                   |
|                           |        |        |       |         |         | 5        | 4          | 7407.8114                     | -3.3                   | 7380.4839                     | -7.6                   |
| 6                         | 2      | 4      | 5     | 2       | 3       | 8        | 7          | 7416.0962                     | 0.6                    | 7390.9410                     | 1.2                    |
|                           |        |        |       |         |         | 7        | 6          | 7416.6921                     | -1.2                   | 7391.4565                     | -3.3                   |
|                           |        |        |       |         |         | 6        | 5          | 7416.7028                     | 1.2                    | 7391.4565                     | -4.4                   |
|                           |        |        |       |         |         | 5        | 4          | 7415.9665                     | -9.2                   | 7390.8468                     | 5.9                    |
| 6                         | 3      | 4      | 5     | 3       | 3       | 8        | 7          | 7409.8817                     | -3.9                   |                               |                        |
|                           |        |        |       |         |         | 7        | 6          | 7410.7283                     | -4.6                   |                               |                        |
|                           |        |        |       |         |         | 6        | 5          | 7410.3563                     | -2.8                   |                               |                        |
|                           |        |        |       |         |         | 5        | 4          | 7409.9194                     | -2.7                   |                               |                        |
| 6                         | 3      | 3      | 5     | 3       | 2       | 8        | 7          | 7409.9795                     | 3.4                    |                               |                        |
|                           |        |        |       |         |         | 7        | 6          | 7410.8328                     | 4.7                    |                               |                        |
|                           |        |        |       |         |         | 6        | 5          | 7410.4453                     | -13.1                  |                               |                        |

|   |   |   |   |   |   |    |   |           |      |           |      |
|---|---|---|---|---|---|----|---|-----------|------|-----------|------|
|   |   |   |   |   |   | 5  | 4 | 7410.0052 | -0.2 |           |      |
| 7 | 0 | 7 | 6 | 0 | 6 | 9  | 8 | 8630.5227 | 1.2  | 8595.4747 | -2.1 |
|   |   |   |   |   |   | 8  | 7 | 8629.9724 | 0.2  | 8594.9958 | -1.2 |
|   |   |   |   |   |   | 7  | 6 | 8630.1313 | -0.4 | 8595.1216 | -3.3 |
|   |   |   |   |   |   | 6  | 5 | 8630.6102 | -1.2 | 8595.5655 | -1.5 |
| 7 | 1 | 7 | 6 | 1 | 6 | 9  | 8 | 8560.6645 | 0.9  | 8519.4231 | -4.1 |
|   |   |   |   |   |   | 8  | 7 | 8560.5712 | -0.9 | 8519.3454 | -0.4 |
|   |   |   |   |   |   | 7  | 6 | 8560.2989 | -1.7 | 8519.1348 | -0.1 |
|   |   |   |   |   |   | 6  | 5 | 8560.3714 | 0.8  | 8519.2018 | -1.1 |
| 7 | 1 | 6 | 6 | 1 | 5 | 9  | 8 | 8720.5083 | 3.3  | 8696.9289 | -0.4 |
|   |   |   |   |   |   | 8  | 7 | 8720.3931 | -4.4 | 8696.8298 | -2.0 |
|   |   |   |   |   |   | 7  | 6 | 8720.8392 | -1.6 | 8697.1807 | -4.4 |
|   |   |   |   |   |   | 6  | 5 | 8720.9215 | -0.1 | 8697.2652 | -1.2 |
| 7 | 2 | 6 | 6 | 2 | 5 | 9  | 8 | 8641.8198 | 0.7  | 8609.7497 | -4.3 |
|   |   |   |   |   |   | 8  | 7 | 8642.0825 | -1.2 | 8609.9179 | -4.4 |
|   |   |   |   |   |   | 7  | 6 | 8641.9593 | 1.2  | 8609.8532 | -4.9 |
|   |   |   |   |   |   | 6  | 5 | 8642.1032 | 9.8  | 8609.9179 | -5.5 |
| 7 | 2 | 5 | 6 | 2 | 4 | 9  | 8 | 8655.0059 | 2.9  | 8626.3997 | -0.6 |
|   |   |   |   |   |   | 8  | 7 | 8655.7874 | -0.6 | 8627.0333 | -1.2 |
|   |   |   |   |   |   | 7  | 6 | 8655.6009 | 0.2  | 8626.9144 | -0.9 |
|   |   |   |   |   |   | 6  | 5 | 8655.2223 | 0.7  | 8626.5215 | -0.6 |
| 7 | 3 | 5 | 6 | 3 | 4 | 9  | 8 | 8645.5509 | 4.0  | 8614.4161 | -5.1 |
|   |   |   |   |   |   | 8  | 7 | 8645.9121 | 1.0  | 8614.7473 | -6.6 |
|   |   |   |   |   |   | 7  | 6 | 8645.9730 | 1.6  | 8614.7579 | -4.4 |
|   |   |   |   |   |   | 6  | 5 | 8645.3835 | -9.1 | 8614.3241 | -3.6 |
| 7 | 3 | 4 | 6 | 3 | 3 | 9  | 8 | 8645.7325 | -0.4 | 8614.6933 | -2.7 |
|   |   |   |   |   |   | 8  | 7 | 8646.1201 | 0.2  | 8615.0448 | -3.4 |
|   |   |   |   |   |   | 7  | 6 | 8646.1690 | 0.3  | 8615.0448 | -4.6 |
|   |   |   |   |   |   | 6  | 5 | 8645.5837 | 0.0  | 8614.6009 | -2.8 |
| 7 | 4 | 4 | 6 | 4 | 3 | 9  | 8 | 8644.6887 | 0.9  |           |      |
|   |   |   |   |   |   | 8  | 7 | 8645.3950 | -7.3 |           |      |
|   |   |   |   |   |   | 7  | 6 | 8645.2764 | 2.4  |           |      |
|   |   |   |   |   |   | 6  | 5 | 8644.5144 | 3.6  |           |      |
| 7 | 4 | 3 | 6 | 4 | 2 | 9  | 8 | 8644.6887 | 0.0  |           |      |
|   |   |   |   |   |   | 8  | 7 | 8645.3950 | -8.5 |           |      |
|   |   |   |   |   |   | 7  | 6 | 8645.2766 | 1.5  |           |      |
|   |   |   |   |   |   | 6  | 5 | 8644.5144 | 2.6  |           |      |
| 8 | 0 | 8 | 7 | 0 | 7 | 10 | 9 | 9858.5553 | -1.8 | 9817.3342 | 2.1  |
|   |   |   |   |   |   | 9  | 8 | 9857.9599 | -1.9 | 9816.8014 | -4.1 |
|   |   |   |   |   |   | 8  | 7 | 9858.0823 | -1.2 | 9816.9056 | -1.4 |
|   |   |   |   |   |   | 7  | 6 | 9858.6505 | -5.7 | 9817.4202 | 0.0  |
| 8 | 1 | 8 | 7 | 1 | 7 | 10 | 9 | 9782.2799 | 8.4  | 9734.8767 | 1.9  |
|   |   |   |   |   |   | 9  | 8 | 9782.1623 | 8.0  | 9734.7694 | -1.2 |
|   |   |   |   |   |   | 8  | 7 | 9781.9530 | -4.4 | 9734.6174 | 0.4  |
|   |   |   |   |   |   | 7  | 6 | 9782.0541 | -5.9 | 9734.7115 | -0.5 |
| 8 | 1 | 7 | 7 | 1 | 6 | 10 | 9 | 9964.8364 | -1.1 | 9937.5333 | -0.1 |
|   |   |   |   |   |   | 9  | 8 | 9964.6942 | -0.4 | 9937.4061 | 2.4  |
|   |   |   |   |   |   | 8  | 7 | 9965.0323 | -4.7 | 9937.6779 | 0.7  |
|   |   |   |   |   |   | 7  | 6 | 9965.1640 | 5.0  | 9937.7918 | -1.5 |
| 8 | 2 | 7 | 7 | 2 | 6 | 10 | 9 | 9875.3864 | 4.1  | 9838.5211 | -4.3 |

|   |   |   |   |   |   |    |    |            |      |            |      |
|---|---|---|---|---|---|----|----|------------|------|------------|------|
|   |   |   |   |   |   | 9  | 8  | 9875.3117  | 3.4  | 9838.4823  | -7.4 |
|   |   |   |   |   |   | 8  | 7  | 9875.4377  | 8.4  | 9838.5574  | -1.9 |
|   |   |   |   |   |   | 7  | 6  | 9875.2974  | -0.2 | 9838.5064  | 5.4  |
| 8 | 2 | 6 | 7 | 2 | 5 | 10 | 9  | 9895.1547  | 3.6  | 9863.4194  | -1.1 |
|   |   |   |   |   |   | 9  | 8  | 9895.6732  | 1.1  | 9863.9130  | 2.9  |
|   |   |   |   |   |   | 8  | 7  | 9895.7299  | 2.8  | 9863.9307  | 5.3  |
|   |   |   |   |   |   | 7  | 6  | 9895.0164  | -6.7 | 9863.3550  | 1.7  |
| 8 | 3 | 6 | 7 | 3 | 5 | 10 | 9  | 9880.9339  | 3.6  | 9845.5089  | -2.3 |
|   |   |   |   |   |   | 9  | 8  | 9881.2197  | 2.0  | 9845.7506  | -4.7 |
|   |   |   |   |   |   | 8  | 7  | 9881.2370  | -3.8 | 9845.7664  | -2.2 |
|   |   |   |   |   |   | 7  | 6  | 9880.8637  | -0.8 | 9845.4594  | -3.2 |
| 8 | 3 | 5 | 7 | 3 | 4 | 10 | 9  | 9881.3149  | 0.3  | 9846.0639  | -1.8 |
|   |   |   |   |   |   | 9  | 8  | 9881.6333  | 2.0  | 9846.3367  | -2.3 |
|   |   |   |   |   |   | 8  | 7  | 9881.6481  | 3.7  | 9846.3367  | -6.0 |
|   |   |   |   |   |   | 7  | 6  | 9881.2528  | 1.7  | 9846.0160  | -2.8 |
| 8 | 4 | 5 | 7 | 4 | 4 | 10 | 9  | 9880.0201  | 1.7  | 9844.5353  | -5.7 |
|   |   |   |   |   |   | 9  | 8  | 9880.3754  | 6.3  | 9844.6561  | -6.1 |
|   |   |   |   |   |   | 8  | 7  | 9880.4856  | 4.7  | 9844.9540  | -5.3 |
|   |   |   |   |   |   | 7  | 6  | 9879.7806  | 4.9  | 9844.1652  | -0.3 |
| 8 | 4 | 4 | 7 | 4 | 3 | 10 | 9  | 9880.0201  | -1.9 | 9844.5468  | -5.4 |
|   |   |   |   |   |   | 9  | 8  | 9880.3754  | 3.3  | 9844.6630  | -4.6 |
|   |   |   |   |   |   | 8  | 7  | 9880.4856  | 0.7  | 9844.9664  | -5.2 |
|   |   |   |   |   |   | 7  | 6  | 9879.7806  | 2.2  | 9844.1652  | -4.8 |
| 9 | 0 | 9 | 8 | 0 | 8 | 11 | 10 | 11084.7259 | 0.0  | 11036.9126 | 3.7  |
|   |   |   |   |   |   | 10 | 9  | 11084.0749 | 0.6  | 11036.3373 | 3.4  |
|   |   |   |   |   |   | 9  | 8  | 11084.1763 | -1.4 | 11036.4240 | 3.2  |
|   |   |   |   |   |   | 8  | 7  | 11084.8194 | 2.8  | 11036.9919 | 3.9  |
| 9 | 1 | 9 | 8 | 1 | 8 | 11 | 10 | 11003.3909 | 2.6  | 10949.7380 | 5.1  |
|   |   |   |   |   |   | 10 | 9  | 11003.2467 | -2.5 | 10949.6149 | 4.8  |
|   |   |   |   |   |   | 9  | 8  | 11003.1004 | 0.2  | 10949.4984 | 4.5  |
|   |   |   |   |   |   | 8  | 7  | 11003.2259 | -0.0 | 10949.6149 | 6.7  |
| 9 | 1 | 8 | 8 | 1 | 7 | 11 | 10 | 11208.5184 | -2.2 | 11177.3389 | 2.1  |
|   |   |   |   |   |   | 10 | 9  | 11208.3396 | -1.6 | 11177.1737 | 0.0  |
|   |   |   |   |   |   | 9  | 8  | 11208.6196 | 0.0  | 11177.3959 | -1.0 |
|   |   |   |   |   |   | 8  | 7  | 11208.7668 | -4.3 | 11177.5395 | 0.6  |
| 9 | 2 | 8 | 8 | 2 | 7 | 11 | 10 | 11108.5358 | 0.9  | 11066.8015 | -2.6 |
|   |   |   |   |   |   | 10 | 9  | 11108.4823 | -2.5 | 11066.7571 | -2.1 |
|   |   |   |   |   |   | 9  | 8  | 11108.5434 | 1.2  | 11066.8015 | -0.7 |
|   |   |   |   |   |   | 8  | 7  | 11108.5544 | 5.2  | 11066.8209 | -1.9 |
| 9 | 2 | 7 | 8 | 2 | 6 | 11 | 10 | 11136.6648 | -1.5 | 11102.1424 | 5.2  |
|   |   |   |   |   |   | 10 | 9  | 11137.2648 | 0.3  | 11102.6701 | 5.2  |
|   |   |   |   |   |   | 9  | 8  | 11137.2648 | -0.3 | 11102.6630 | 3.6  |
|   |   |   |   |   |   | 8  | 7  | 11136.6316 | 0.9  | 11102.1168 | 5.4  |
| 9 | 3 | 7 | 8 | 3 | 6 | 11 | 10 | 11116.6374 | -1.5 | 11076.6263 | -1.4 |
|   |   |   |   |   |   | 10 | 9  | 11116.5272 | -3.3 | 11076.6224 | -0.9 |
|   |   |   |   |   |   | 9  | 8  | 11116.8918 | -1.7 | 11076.7899 | -1.1 |
|   |   |   |   |   |   | 8  | 7  | 11116.2348 | 3.2  | 11076.3484 | 0.0  |
| 9 | 3 | 6 | 8 | 3 | 5 | 11 | 10 | 11117.1594 | -0.9 | 11077.7605 | 0.0  |
|   |   |   |   |   |   | 10 | 9  | 11117.2850 | 9.7  | 11077.6823 | -1.1 |
|   |   |   |   |   |   | 9  | 8  | 11117.4360 | 1.9  | 11077.9858 | -0.3 |



|    |   |    |    |   |    |    |    |            |      |            |      |
|----|---|----|----|---|----|----|----|------------|------|------------|------|
|    |   |    |    |   |    | 8  | 7  | 11116.9452 | 1.4  | 11077.3647 | 0.0  |
| 10 | 0 | 10 | 9  | 0 | 9  | 12 | 11 | 12308.8868 | 0.5  | 12254.0738 | 8.7  |
|    |   |    |    |   |    | 11 | 10 | 12308.1824 | -0.9 | 12253.4568 | 8.2  |
|    |   |    |    |   |    | 10 | 9  | 12308.2736 | -0.3 | 12253.5327 | 8.2  |
|    |   |    |    |   |    | 9  | 8  | 12308.9702 | 2.2  | 12254.1449 | 9.3  |
| 10 | 1 | 10 | 9  | 1 | 9  | 12 | 11 | 12223.9722 | 2.2  | 12163.9645 | 11.1 |
|    |   |    |    |   |    | 11 | 10 | 12223.8060 | -3.8 | 12163.8245 | 11.4 |
|    |   |    |    |   |    | 10 | 9  | 12223.6986 | 1.7  | 12163.7363 | 11.3 |
|    |   |    |    |   |    | 9  | 8  | 12223.8380 | 0.8  | 12163.8614 | 9.7  |
| 10 | 1 | 9  | 9  | 1 | 8  | 12 | 11 | 12451.4552 | -2.7 | 12416.2159 | 1.7  |
|    |   |    |    |   |    | 11 | 10 | 12451.0548 | 1.5  | 12416.1307 | 0.9  |
|    |   |    |    |   |    | 10 | 9  | 12451.4749 | 3.2  | 12416.2159 | 3.9  |
|    |   |    |    |   |    | 9  | 8  | 12451.4552 | -1.4 | 12416.5224 | 3.5  |
| 10 | 2 | 9  | 9  | 2 | 8  | 12 | 11 | 12341.2257 | -2.9 | 12294.5319 | -0.4 |
|    |   |    |    |   |    | 11 | 10 | 12341.1506 | -2.5 | 12294.4616 | -1.3 |
|    |   |    |    |   |    | 10 | 9  | 12341.2009 | 4.6  | 12294.4970 | -0.3 |
|    |   |    |    |   |    | 9  | 8  | 12341.2582 | 7.6  | 12294.5530 | -1.1 |
| 11 | 0 | 11 | 10 | 0 | 10 | 13 | 12 | 13530.9462 | -1.3 |            |      |
|    |   |    |    |   |    | 12 | 11 | 13530.1988 | -3.1 |            |      |
|    |   |    |    |   |    | 11 | 10 | 13530.2831 | 0.8  |            |      |
|    |   |    |    |   |    | 10 | 9  | 13531.0194 | -1.3 |            |      |
| 11 | 1 | 11 | 10 | 1 | 10 | 13 | 12 | 13443.9783 | -0.9 |            |      |
|    |   |    |    |   |    | 12 | 11 | 13443.7540 | -1.0 |            |      |
|    |   |    |    |   |    | 11 | 10 | 13443.7104 | -3.2 |            |      |
|    |   |    |    |   |    | 10 | 9  | 13443.8079 | -1.2 |            |      |
| 11 | 1 | 10 | 10 | 1 | 9  | 13 | 12 | 13693.5423 | -2.2 |            |      |
|    |   |    |    |   |    | 12 | 11 | 13693.5470 | -3.9 |            |      |
|    |   |    |    |   |    | 11 | 10 | 13693.5113 | 4.3  |            |      |
|    |   |    |    |   |    | 10 | 9  | 13693.9855 | 2.1  |            |      |
| 12 | 0 | 12 | 11 | 0 | 11 | 14 | 13 | 14750.8818 | 2.4  |            |      |
|    |   |    |    |   |    | 13 | 12 | 14750.0974 | 0.8  |            |      |
|    |   |    |    |   |    | 12 | 11 | 14750.1676 | -5.6 |            |      |
|    |   |    |    |   |    | 11 | 10 | 14750.9381 | -0.7 |            |      |
| 12 | 1 | 12 | 11 | 1 | 11 | 14 | 13 | 14663.3860 | 0.9  |            |      |
|    |   |    |    |   |    | 13 | 12 | 14663.3036 | 1.6  |            |      |
|    |   |    |    |   |    | 12 | 11 | 14663.1248 | -3.8 |            |      |
|    |   |    |    |   |    | 11 | 10 | 14663.4249 | 3.9  |            |      |
| 12 | 1 | 11 | 11 | 1 | 10 | 14 | 13 | 14934.6679 | 0.8  |            |      |
|    |   |    |    |   |    | 13 | 12 | 14934.3933 | -0.8 |            |      |
|    |   |    |    |   |    | 12 | 11 | 14934.5619 | -1.8 |            |      |
|    |   |    |    |   |    | 11 | 10 | 14934.8084 | -0.7 |            |      |
| 2  | 2 | 1  | 1  | 1 | 0  | 4  | 3  | 7355.4259  | 3.0  | 7245.4282  | 2.1  |
|    |   |    |    |   |    | 3  | 2  | 7343.5467  | -0.3 | 7235.9759  | 2.3  |
|    |   |    |    |   |    | 2  | 1  | 7362.5335  | 0.0  | 7250.9800  | -2.5 |
|    |   |    |    |   |    | 3  | 3  | 7353.0220  | -6.5 | 7243.4616  | 1.3  |
| 2  | 2 | 0  | 1  | 1 | 1  | 4  | 3  | 7374.1421  | 2.6  | 7267.6716  | 2.5  |
|    |   |    |    |   |    | 3  | 2  | 7383.7850  | -1.3 | 7275.3003  | 2.4  |
|    |   |    |    |   |    | 2  | 1  | 7363.8500  | -1.7 | 7259.4981  | 2.5  |
|    |   |    |    |   |    | 2  | 2  | 7385.4323  | -1.1 | 7276.6330  | -1.7 |
| 3  | 2 | 2  | 2  | 1 | 1  | 5  | 4  | 8568.7851  | 3.4  | 8454.1690  | -1.3 |

|   |   |   |   |   |   |   |   |            |      |            |      |
|---|---|---|---|---|---|---|---|------------|------|------------|------|
|   |   |   |   |   |   | 4 | 3 | 8556.3224  | -4.2 | 8442.9344  | -5.3 |
|   |   |   |   |   |   | 3 | 2 | 8565.9899  | -0.9 | 8442.7343  | -3.4 |
|   |   |   |   |   |   | 2 | 1 | 8576.6548  | 9.4  | 8457.7209  | 0.2  |
| 3 | 3 | 0 | 2 | 2 | 1 | 5 | 4 | 11862.2674 | 2.0  | 11683.5147 | 3.4  |
|   |   |   |   |   |   | 4 | 3 | 11861.7047 | -1.8 | 11683.0576 | -0.4 |
|   |   |   |   |   |   | 3 | 2 | 11861.3289 | -6.4 | 11682.7540 | -3.3 |
|   |   |   |   |   |   | 2 | 1 | 11861.9354 | 14.6 |            |      |
| 3 | 3 | 1 | 2 | 2 | 0 | 4 | 3 | 11861.3555 | 2.3  | 11682.6555 | 2.4  |
|   |   |   |   |   |   | 3 | 2 | 11861.0938 | -1.8 | 11682.4500 | -2.5 |
|   |   |   |   |   |   | 5 | 4 | 11862.0701 | 2.4  | 11683.2485 | 3.6  |
|   |   |   |   |   |   | 2 | 1 | 11861.8265 | 3.2  | 11683.0576 | 2.3  |
| 4 | 1 | 4 | 3 | 0 | 3 | 6 | 5 | 6460.9075  | 6.3  |            |      |
|   |   |   |   |   |   | 5 | 4 | 6449.3787  | 3.1  |            |      |
|   |   |   |   |   |   | 4 | 3 | 6453.9094  | 5.9  |            |      |
|   |   |   |   |   |   | 3 | 2 | 6463.6946  | 1.7  |            |      |
| 4 | 2 | 3 | 3 | 1 | 2 | 6 | 5 | 9769.0217  | 1.6  |            |      |
|   |   |   |   |   |   | 5 | 4 | 9757.3817  | -1.0 |            |      |
|   |   |   |   |   |   | 4 | 3 | 9763.0165  | -1.5 |            |      |
|   |   |   |   |   |   | 3 | 2 | 9774.4975  | 0.8  |            |      |
| 5 | 1 | 5 | 4 | 0 | 4 | 7 | 6 | 7639.9369  | 0.3  | 7565.0222  | -2.7 |
|   |   |   |   |   |   | 6 | 5 | 7629.4570  | 1.2  | 7556.7544  | -8.0 |
|   |   |   |   |   |   | 5 | 4 | 7632.5107  | 0.2  | 7559.1677  | -6.7 |
|   |   |   |   |   |   | 4 | 3 | 7643.0925  | -2.8 | 7567.4983  | -2.6 |
| 5 | 2 | 4 | 4 | 1 | 3 | 7 | 6 | 10958.0820 | 1.8  | 10822.9045 | -1.1 |
|   |   |   |   |   |   | 6 | 5 | 10946.4667 | -0.4 | 10813.8055 | -3.8 |
|   |   |   |   |   |   | 5 | 4 | 10950.7238 | 2.5  | 10817.1027 | -6.1 |
|   |   |   |   |   |   | 4 | 3 | 10961.6122 | -3.0 | 10825.9242 | -5.9 |
| 5 | 3 | 3 | 4 | 2 | 2 | 7 | 6 | 14330.0338 | -1.1 | 14141.6510 | 0.0  |
|   |   |   |   |   |   | 6 | 5 | 14328.7456 | -1.4 | 14140.5705 | -1.0 |
|   |   |   |   |   |   | 5 | 4 | 14329.3325 | -2.7 | 14141.0486 | -0.4 |
|   |   |   |   |   |   | 4 | 3 | 14330.3641 | -3.6 | 14141.9547 | 2.5  |
| 5 | 3 | 2 | 4 | 2 | 3 | 7 | 6 | 14333.5504 | 3.8  | 14145.9596 | -0.4 |
|   |   |   |   |   |   | 6 | 5 | 14333.3613 | 0.8  | 14145.5739 | 2.6  |
|   |   |   |   |   |   | 5 | 4 | 14333.0609 | -1.3 | 14145.7205 | 1.8  |
|   |   |   |   |   |   | 4 | 3 | 14332.8400 | 0.7  | 14146.1312 | 0.1  |
| 6 | 0 | 6 | 5 | 1 | 5 | 8 | 7 | 5930.4612  | -1.5 |            |      |
|   |   |   |   |   |   | 7 | 6 | 5937.4550  | -0.6 |            |      |
|   |   |   |   |   |   | 6 | 5 | 5937.4550  | 0.7  |            |      |
|   |   |   |   |   |   | 5 | 4 | 5927.7699  | -1.0 |            |      |
| 6 | 1 | 6 | 5 | 0 | 5 | 8 | 7 | 8808.9507  | -1.1 |            |      |
|   |   |   |   |   |   | 7 | 6 | 8798.8741  | 0.7  | 8722.6790  | -6.4 |
|   |   |   |   |   |   | 6 | 5 | 8801.2614  | 1.1  | 8714.7855  | -3.8 |
|   |   |   |   |   |   | 5 | 4 | 8811.58970 | -1.7 | 8716.6460  | -2.6 |
| 6 | 2 | 5 | 5 | 1 | 4 | 8 | 7 | 12135.7577 | -0.3 | 8724.7648  | -2.8 |
|   |   |   |   |   |   | 7 | 6 | 12124.5095 | -1.5 |            |      |
|   |   |   |   |   |   | 6 | 5 | 12127.8106 | -1.5 |            |      |
|   |   |   |   |   |   | 5 | 4 | 12138.8337 | -3.3 |            |      |
| 6 | 3 | 4 | 5 | 2 | 3 | 8 | 7 | 15561.6531 | 1.5  |            |      |
|   |   |   |   |   |   | 7 | 6 | 15560.4345 | -1.1 |            |      |
|   |   |   |   |   |   | 6 | 5 | 15560.7297 | -0.8 |            |      |

|   |   |   |   |   |   |    |    |            |      |            |      |
|---|---|---|---|---|---|----|----|------------|------|------------|------|
|   |   |   |   |   |   | 5  | 4  | 15562.1773 | 1.6  |            |      |
| 7 | 0 | 7 | 6 | 1 | 6 | 9  | 8  | 7222.3705  | 1.4  | 7244.3356  | -1.8 |
|   |   |   |   |   |   | 8  | 7  | 7231.5955  | -1.1 | 7251.4700  | 0.9  |
|   |   |   |   |   |   | 7  | 6  | 7229.4054  | -1.6 | 7249.7778  | 0.6  |
|   |   |   |   |   |   | 6  | 5  | 7220.1992  | -0.6 | 7242.6522  | -4.8 |
| 7 | 1 | 7 | 6 | 0 | 6 | 9  | 8  | 9968.8150  | -0.9 | 9870.5649  | -1.7 |
|   |   |   |   |   |   | 8  | 7  | 9958.9438  | -3.8 | 9862.8745  | 0.6  |
|   |   |   |   |   |   | 7  | 6  | 9961.0226  | -2.7 | 9864.4804  | -2.3 |
|   |   |   |   |   |   | 6  | 5  | 9970.7800  | -2.1 | 9872.1080  | -4.9 |
| 7 | 2 | 6 | 6 | 1 | 5 | 9  | 8  | 13301.9669 | -0.8 |            |      |
|   |   |   |   |   |   | 8  | 7  | 13291.0510 | -3.8 |            |      |
|   |   |   |   |   |   | 7  | 6  | 13293.6177 | 0.3  |            |      |
|   |   |   |   |   |   | 6  | 5  | 13304.7619 | -0.1 |            |      |
| 7 | 3 | 4 | 6 | 2 | 5 | 9  | 8  | 16807.7066 | 3.2  |            |      |
|   |   |   |   |   |   | 8  | 7  | 16807.7690 | -1.8 |            |      |
|   |   |   |   |   |   | 7  | 6  | 16807.7865 | 2.4  |            |      |
|   |   |   |   |   |   | 6  | 5  | 16807.8126 | 5.1  |            |      |
| 8 | 0 | 8 | 7 | 1 | 7 | 10 | 9  | 8520.2611  | -1.5 | 8542.2434  | 1.1  |
|   |   |   |   |   |   | 9  | 8  | 8528.9850  | -1.3 | 8548.9297  | 0.9  |
|   |   |   |   |   |   | 8  | 7  | 8527.1857  | -4.3 | 8547.5507  | 1.4  |
|   |   |   |   |   |   | 7  | 6  | 8518.4868  | 1.2  | 8540.8750  | 0.6  |
| 8 | 1 | 8 | 7 | 0 | 7 | 10 | 9  | 11120.5665 | 0.6  | 11009.9659 | 1.4  |
|   |   |   |   |   |   | 9  | 8  | 11111.1291 | -0.6 | 11002.6480 | 0.6  |
|   |   |   |   |   |   | 8  | 7  | 11112.8495 | -1.5 | 11003.9736 | -1.1 |
|   |   |   |   |   |   | 7  | 6  | 11122.2306 | 0.0  | 11011.2586 | 0.7  |
| 9 | 0 | 9 | 8 | 1 | 8 | 11 | 10 | 9822.7158  | -1.3 | 9844.2813  | 4.9  |
|   |   |   |   |   |   | 10 | 9  | 9830.9049  | -1.4 | 9850.4960  | 4.0  |
|   |   |   |   |   |   | 9  | 8  | 9829.4083  | -2.0 | 9849.3563  | 3.2  |
|   |   |   |   |   |   | 8  | 7  | 9821.2433  | 1.2  | 9843.1564  | 6.0  |
| 9 | 1 | 9 | 8 | 0 | 8 | 11 | 10 | 12265.3694 | -0.6 | 12142.3725 | 7.1  |
|   |   |   |   |   |   | 10 | 9  | 12256.4185 | 1.3  | 12135.4567 | 4.7  |
|   |   |   |   |   |   | 9  | 8  | 12257.8658 | -1.7 | 12136.5658 | 4.3  |
|   |   |   |   |   |   | 8  | 7  | 12266.8041 | 3.6  | 12143.4482 | 2.4  |
| 7 | 3 | 4 | 7 | 2 | 5 | 8  | 8  | 8134.2187  | -1.0 | 7963.7253  | -3.5 |
|   |   |   |   |   |   | 7  | 7  | 8134.7432  | -3.4 | 7964.1478  | -2.4 |
|   |   |   |   |   |   | 9  | 9  | 8136.4206  | 1.4  | 7965.5998  | -1.7 |
|   |   |   |   |   |   | 6  | 6  | 8136.6804  | -4.0 | 7965.8866  | -3.2 |
| 6 | 3 | 3 | 6 | 2 | 4 | 7  | 7  | 8143.8850  | -2.3 | 7975.7140  | -1.1 |
|   |   |   |   |   |   | 6  | 6  | 8144.1764  | -0.8 | 7976.0179  | 1.7  |
|   |   |   |   |   |   | 8  | 8  | 8145.6891  | -0.1 | 7977.3066  | 0.7  |
|   |   |   |   |   |   | 5  | 5  | 8146.3214  | -0.8 | 7977.8067  | -1.4 |
| 5 | 3 | 2 | 5 | 2 | 3 | 6  | 6  | 8149.7513  | -1.3 | 7983.1260  | 2.5  |
|   |   |   |   |   |   | 5  | 5  | 8150.4192  | -1.1 | 7983.6801  | 2.2  |
|   |   |   |   |   |   | 7  | 7  | 8151.8087  | 0.0  | 7984.8649  | 3.5  |
|   |   |   |   |   |   | 4  | 4  | 8152.2900  | -2.5 | 7985.2842  | 3.0  |
| 3 | 2 | 1 | 2 | 1 | 2 | 5  | 4  | 8631.4498  | 2.6  | 8523.6542  | 2.3  |
|   |   |   |   |   |   | 4  | 4  | 8632.0631  | 0.4  | 8524.0914  | 0.7  |
|   |   |   |   |   |   | 3  | 2  | 8634.0745  | 0.3  | 8525.8607  | 0.1  |
|   |   |   |   |   |   | 2  | 2  | 8634.2543  | -0.8 | 8528.7366  | 0.2  |
|   |   |   |   |   |   | 3  | 3  | 8640.9512  | -1.0 | 8531.2748  | 1.8  |

|   |   |   |   |   |   |    |    |            |      |            |      |
|---|---|---|---|---|---|----|----|------------|------|------------|------|
|   |   |   |   |   |   | 4  | 3  | 8641.5817  | -2.4 | 8531.6018  | 1.4  |
| 4 | 2 | 2 | 3 | 1 | 3 | 3  | 2  | 9897.8533  | -0.6 | 9790.8797  | 0.2  |
|   |   |   |   |   |   | 6  | 5  | 9902.5603  | 1.2  | 9794.6303  | 2.9  |
|   |   |   |   |   |   | 4  | 3  | 9908.3630  | -1.7 | 9799.2678  | -0.7 |
|   |   |   |   |   |   | 4  | 4  | 9912.6011  | -3.3 |            |      |
|   |   |   |   |   |   | 5  | 4  | 9913.2066  | -1.8 |            |      |
| 5 | 2 | 3 | 4 | 1 | 4 | 4  | 3  | 11184.8061 | 0.0  | 11072.7498 | -1.8 |
|   |   |   |   |   |   | 7  | 6  | 11187.3991 | 2.5  | 11081.3247 | 2.3  |
|   |   |   |   |   |   | 5  | 4  | 11195.0008 | -0.1 | 11088.7862 | -0.8 |
|   |   |   |   |   |   | 6  | 5  | 11199.2679 | -0.2 | 11093.5241 | -0.2 |
| 8 | 4 | 4 | 8 | 3 | 5 | 9  | 9  | 11415.8355 | -0.4 |            |      |
|   |   |   |   |   |   | 8  | 8  | 11416.2217 | -0.1 |            |      |
|   |   |   |   |   |   | 7  | 7  | 11416.8960 | -2.1 |            |      |
| 9 | 4 | 6 | 9 | 3 | 7 | 8  | 8  | 11416.3760 | 1.4  |            |      |
| 8 | 4 | 5 | 8 | 3 | 6 | 9  | 9  | 11416.5984 | -0.3 |            |      |
|   |   |   |   |   |   | 7  | 7  | 11417.5928 | -1.2 |            |      |
|   |   |   |   |   |   | 10 | 10 | 11417.6150 | 3.3  |            |      |
| 7 | 4 | 3 | 7 | 3 | 4 | 8  | 8  | 11417.0933 | -1.8 |            |      |
|   |   |   |   |   |   | 7  | 7  | 11417.3776 | -3.6 |            |      |
|   |   |   |   |   |   | 9  | 9  | 11418.2066 | 0.8  |            |      |
|   |   |   |   |   |   | 6  | 6  | 11418.3710 | 0.1  |            |      |
| 7 | 4 | 4 | 7 | 3 | 5 | 8  | 8  | 11417.4470 | -0.3 |            |      |
|   |   |   |   |   |   | 7  | 7  | 11417.7281 | 2.7  |            |      |
|   |   |   |   |   |   | 9  | 9  | 11418.5219 | -1.6 |            |      |
|   |   |   |   |   |   | 6  | 6  | 11418.6793 | -3.6 |            |      |
| 4 | 4 | 0 | 4 | 3 | 1 | 5  | 5  | 11417.7688 | 8.6  |            |      |
|   |   |   |   |   |   | 4  | 4  | 11418.6497 | 10.0 |            |      |
|   |   |   |   |   |   | 6  | 6  | 11420.3567 | -1.9 |            |      |
|   |   |   |   |   |   | 3  | 3  | 11421.3002 | 0.3  |            |      |
| 4 | 4 | 1 | 4 | 3 | 2 | 5  | 5  | 11417.7765 | 1.1  |            |      |
|   |   |   |   |   |   | 4  | 4  | 11418.6497 | -1.9 |            |      |
|   |   |   |   |   |   | 6  | 6  | 11420.3750 | 3.2  |            |      |
|   |   |   |   |   |   | 3  | 3  | 11421.3098 | 0.9  |            |      |
| 6 | 4 | 2 | 6 | 3 | 3 | 7  | 7  | 11417.8058 | -5.7 |            |      |
|   |   |   |   |   |   | 6  | 6  | 11418.2737 | -1.1 |            |      |
|   |   |   |   |   |   | 8  | 8  | 11419.2492 | -0.6 |            |      |
|   |   |   |   |   |   | 5  | 5  | 11419.4411 | -1.7 |            |      |
| 6 | 4 | 3 | 6 | 3 | 4 | 7  | 7  | 11417.9528 | -3.2 |            |      |
|   |   |   |   |   |   | 6  | 6  | 11418.4160 | -6.7 |            |      |
|   |   |   |   |   |   | 8  | 8  | 11419.3802 | -2.4 |            |      |
|   |   |   |   |   |   | 5  | 5  | 11419.5620 | -2.8 |            |      |
| 5 | 4 | 1 | 5 | 3 | 2 | 6  | 6  | 11418.0254 | -1.0 |            |      |
|   |   |   |   |   |   | 5  | 5  | 11418.4423 | 18.0 |            |      |
|   |   |   |   |   |   | 7  | 7  | 11419.7499 | -0.7 |            |      |
|   |   |   |   |   |   | 4  | 4  | 11420.3237 | 0.1  |            |      |
| 5 | 4 | 2 | 5 | 3 | 3 | 6  | 6  | 11418.0840 | 7.6  |            |      |
|   |   |   |   |   |   | 5  | 5  | 11418.4921 | 17.9 |            |      |
|   |   |   |   |   |   | 7  | 7  | 11419.7888 | -4.6 |            |      |
|   |   |   |   |   |   | 4  | 4  | 11420.3567 | -5.8 |            |      |
| 5 | 4 | 2 | 4 | 3 | 1 | 7  | 6  | 17594.5399 | -1.8 |            |      |

|   |   |   |   |   |   |   |   |            |      |
|---|---|---|---|---|---|---|---|------------|------|
|   |   |   |   |   |   | 6 | 5 | 17593.9088 | -7.9 |
|   |   |   |   |   |   | 5 | 4 | 17594.0187 | -4.5 |
|   |   |   |   |   |   | 4 | 3 | 17594.6752 | -1.7 |
| 5 | 4 | 1 | 4 | 3 | 2 | 7 | 6 | 17594.5544 | -0.5 |
|   |   |   |   |   |   | 6 | 5 | 17593.9287 | -3.2 |
|   |   |   |   |   |   | 5 | 4 | 17594.0347 | -0.6 |
|   |   |   |   |   |   | 4 | 3 | 17594.6856 | -0.4 |

---

**Table S6.** Experimental transition frequencies ( $\nu_{\text{obs}}$ , MHz) and observed minus calculated values ( $\Delta\nu$ , kHz) of the  $\alpha$   $^{13}\text{C}$  isotopologue of isomer I of furan- $\text{CF}_3\text{Cl}$ .

| Furan- $\text{CF}_3\text{Cl}$ C $\alpha$ |        |        |       |         |         |          |           |                               |                        |
|------------------------------------------|--------|--------|-------|---------|---------|----------|-----------|-------------------------------|------------------------|
| $J'$                                     | $K_a'$ | $K_c'$ | $J''$ | $K_a''$ | $K_c''$ | $F'+1/2$ | $F''+1/2$ | $\nu_{\text{obs}}/\text{MHz}$ | $\Delta\nu/\text{kHz}$ |
| 6                                        | 0      | 6      | 5     | 0       | 5       | 8        | 7         | 7354.4540                     | -2.1                   |
|                                          |        |        |       |         |         | 7        | 6         | 7354.1693                     | -2.5                   |
|                                          |        |        |       |         |         | 6        | 5         | 7354.2055                     | -1.6                   |
|                                          |        |        |       |         |         | 5        | 4         | 7354.8358                     | 1.0                    |
| 6                                        | 1      | 6      | 5     | 1       | 5       | 8        | 7         | 7294.7935                     | -1.2                   |
|                                          |        |        |       |         |         | 7        | 6         | 7294.7317                     | -1.4                   |
|                                          |        |        |       |         |         | 6        | 5         | 7294.3608                     | -1.3                   |
|                                          |        |        |       |         |         | 5        | 4         | 7294.3608                     | -0.7                   |
| 6                                        | 1      | 5      | 5     | 1       | 4       | 8        | 7         | 7425.7004                     | -3.1                   |
|                                          |        |        |       |         |         | 7        | 6         | 7425.6363                     | -2.3                   |
|                                          |        |        |       |         |         | 6        | 5         | 7426.2498                     | -1.4                   |
|                                          |        |        |       |         |         | 5        | 4         | 7426.2618                     | 0.2                    |
| 6                                        | 2      | 5      | 5     | 2       | 4       | 8        | 7         | 7360.9695                     | -2.3                   |
|                                          |        |        |       |         |         | 7        | 6         | 7361.0988                     | -1.6                   |
|                                          |        |        |       |         |         | 6        | 5         | 7361.2031                     | 0.4                    |
|                                          |        |        |       |         |         | 5        | 4         | 7360.8794                     | -3.8                   |
| 7                                        | 0      | 7      | 6     | 0       | 6       | 9        | 8         | 8576.7428                     | -1.0                   |
|                                          |        |        |       |         |         | 8        | 7         | 8576.2113                     | -2.3                   |
|                                          |        |        |       |         |         | 7        | 6         | 8576.3703                     | -1.2                   |
|                                          |        |        |       |         |         | 6        | 5         | 8576.8326                     | 1.2                    |
| 7                                        | 1      | 7      | 6     | 1       | 6       | 9        | 8         | 8509.6084                     | -0.2                   |
|                                          |        |        |       |         |         | 8        | 7         | 8509.5225                     | 0.7                    |
|                                          |        |        |       |         |         | 7        | 6         | 8509.2500                     | 0.2                    |
|                                          |        |        |       |         |         | 6        | 5         | 8509.3155                     | 0.4                    |
| 7                                        | 1      | 6      | 6     | 1       | 5       | 9        | 8         | 8662.3626                     | 1.2                    |
|                                          |        |        |       |         |         | 8        | 7         | 8662.2603                     | 0.6                    |
|                                          |        |        |       |         |         | 7        | 6         | 8662.7041                     | 1.8                    |
|                                          |        |        |       |         |         | 6        | 5         | 8662.7758                     | -1.4                   |
| 7                                        | 2      | 6      | 6     | 2       | 5       | 9        | 8         | 8587.1198                     | 4.1                    |
|                                          |        |        |       |         |         | 8        | 7         | 8587.3797                     | -5.5                   |
|                                          |        |        |       |         |         | 7        | 6         | 8587.2571                     | -0.6                   |
|                                          |        |        |       |         |         | 6        | 5         | 8587.3920                     | 0.4                    |
| 8                                        | 0      | 8      | 7     | 0       | 7       | 10       | 9         | 9797.4718                     | 0.6                    |
|                                          |        |        |       |         |         | 9        | 8         | 9796.8965                     | -0.6                   |
|                                          |        |        |       |         |         | 8        | 7         | 9797.0191                     | 2.0                    |
|                                          |        |        |       |         |         | 7        | 6         | 9797.8025                     | 3.2                    |
| 8                                        | 1      | 8      | 7     | 1       | 7       | 10       | 9         | 9724.0132                     | 1.9                    |
|                                          |        |        |       |         |         | 9        | 8         | 9723.8992                     | 0.1                    |
|                                          |        |        |       |         |         | 8        | 7         | 9723.7039                     | 2.1                    |
|                                          |        |        |       |         |         | 7        | 6         | 9723.8025                     | 3.2                    |
| 8                                        | 1      | 7      | 7     | 1       | 6       | 10       | 9         | 9898.4982                     | 2.3                    |
|                                          |        |        |       |         |         | 9        | 8         | 9898.3626                     | 2.9                    |
|                                          |        |        |       |         |         | 8        | 7         | 9898.7026                     | 1.2                    |
|                                          |        |        |       |         |         | 7        | 6         | 9898.8190                     | 2.5                    |

**Table S7.** Experimental transition frequencies ( $\nu_{\text{obs}}$ , MHz) and observed minus calculated values ( $\Delta\nu$ , kHz) of the  $\beta$   $^{13}\text{C}$  isotopologue of isomer I of furan- $\text{CF}_3\text{Cl}$ .

| Furan- $\text{CF}_3\text{Cl}$ C $\beta$ |        |        |       |         |         |          |           |                               |                        |
|-----------------------------------------|--------|--------|-------|---------|---------|----------|-----------|-------------------------------|------------------------|
| $J'$                                    | $K_a'$ | $K_c'$ | $J''$ | $K_a''$ | $K_c''$ | $F'+1/2$ | $F''+1/2$ | $\nu_{\text{obs}}/\text{MHz}$ | $\Delta\nu/\text{kHz}$ |
| 6                                       | 0      | 6      | 5     | 0       | 5       | 8        | 7         | 7318.7343                     | -2.7                   |
|                                         |        |        |       |         |         | 7        | 6         | 7318.4327                     | -4.1                   |
|                                         |        |        |       |         |         | 6        | 5         | 7318.4768                     | -5.1                   |
|                                         |        |        |       |         |         | 5        | 4         | 7319.0901                     | -9.3                   |
| 6                                       | 1      | 6      | 5     | 1       | 5       | 8        | 7         | 7258.1484                     | -1.4                   |
|                                         |        |        |       |         |         | 7        | 6         | 7258.0820                     | -3.0                   |
|                                         |        |        |       |         |         | 6        | 5         | 7257.7155                     | -5.1                   |
|                                         |        |        |       |         |         | 5        | 4         | 7257.7155                     | -1.2                   |
| 6                                       | 1      | 5      | 5     | 1       | 4       | 8        | 7         | 7391.2396                     | -1.4                   |
|                                         |        |        |       |         |         | 7        | 6         | 7391.1720                     | -1.8                   |
|                                         |        |        |       |         |         | 6        | 5         | 7391.7814                     | -6.4                   |
|                                         |        |        |       |         |         | 5        | 4         | 7391.7996                     | 1.7                    |
| 6                                       | 2      | 5      | 5     | 2       | 4       | 8        | 7         | 7325.4462                     | 2.5                    |
|                                         |        |        |       |         |         | 7        | 6         | 7325.5689                     | -4.9                   |
|                                         |        |        |       |         |         | 6        | 5         | 7325.6684                     | -7.6                   |
|                                         |        |        |       |         |         | 5        | 4         | 7325.6684                     | -7.6                   |
| 7                                       | 0      | 7      | 6     | 0       | 6       | 9        | 8         | 8534.9796                     | 0.1                    |
|                                         |        |        |       |         |         | 8        | 7         | 8534.4420                     | 1.7                    |
|                                         |        |        |       |         |         | 7        | 6         | 8534.6007                     | -1.1                   |
|                                         |        |        |       |         |         | 6        | 5         | 8535.0578                     | -4.6                   |
| 7                                       | 1      | 7      | 6     | 1       | 6       | 9        | 8         | 8466.8355                     | 1.3                    |
|                                         |        |        |       |         |         | 8        | 7         | 8466.7452                     | -0.4                   |
|                                         |        |        |       |         |         | 7        | 6         | 8466.4692                     | -0.1                   |
|                                         |        |        |       |         |         | 6        | 5         | 8466.5369                     | -0.4                   |
| 7                                       | 1      | 6      | 6     | 1       | 5       | 9        | 8         | 8622.1306                     | 0.7                    |
|                                         |        |        |       |         |         | 8        | 7         | 8622.0267                     | 0.3                    |
|                                         |        |        |       |         |         | 7        | 6         | 8622.4655                     | -3.4                   |
|                                         |        |        |       |         |         | 6        | 5         | 8622.5432                     | -2.1                   |
| 7                                       | 2      | 6      | 6     | 2       | 5       | 9        | 8         | 8545.6486                     | 2.2                    |
|                                         |        |        |       |         |         | 8        | 7         | 8545.9338                     | -0.2                   |
|                                         |        |        |       |         |         | 7        | 6         | 8545.7858                     | -3.4                   |
|                                         |        |        |       |         |         | 6        | 5         | 8545.9539                     | 6.1                    |
| 8                                       | 0      | 8      | 7     | 0       | 7       | 10       | 9         | 9749.6237                     | 2.5                    |
|                                         |        |        |       |         |         | 9        | 8         | 9749.0420                     | 1.4                    |
|                                         |        |        |       |         |         | 8        | 7         | 9749.1642                     | 2.6                    |
|                                         |        |        |       |         |         | 7        | 6         | 9749.7152                     | -2.8                   |
| 8                                       | 1      | 8      | 7     | 1       | 7       | 10       | 9         | 9675.1031                     | 5.1                    |
|                                         |        |        |       |         |         | 9        | 8         | 9674.9882                     | 3.8                    |
|                                         |        |        |       |         |         | 8        | 7         | 9674.7901                     | 2.9                    |
|                                         |        |        |       |         |         | 7        | 6         | 9674.8896                     | 3.5                    |
| 8                                       | 1      | 7      | 7     | 1       | 6       | 10       | 9         | 9852.4889                     | 6.1                    |
|                                         |        |        |       |         |         | 9        | 8         | 9852.3515                     | 6.7                    |
|                                         |        |        |       |         |         | 8        | 7         | 9852.6892                     | 2.5                    |
|                                         |        |        |       |         |         | 7        | 6         | 9852.8073                     | 3.6                    |

**Table S8.** Experimental transition frequencies ( $\nu_{\text{obs}}$ , MHz) and observed minus calculated values ( $\Delta\nu$ , kHz) of the  $^{13}\text{C}$  isotopologue in  $\text{CF}_3\text{Cl}$  fragment of isomer I of furan- $^{13}\text{C}\text{F}_3\text{Cl}$ .

| Furan- $^{13}\text{C}\text{F}_3\text{Cl}$ |        |        |       |         |         |          |           |                               |                        |
|-------------------------------------------|--------|--------|-------|---------|---------|----------|-----------|-------------------------------|------------------------|
| $J'$                                      | $K_a'$ | $K_c'$ | $J''$ | $K_a''$ | $K_c''$ | $F'+1/2$ | $F''+1/2$ | $\nu_{\text{obs}}/\text{MHz}$ | $\Delta\nu/\text{kHz}$ |
| 6                                         | 0      | 6      | 5     | 0       | 5       | 8        | 7         | 7374.5960                     | -1.0                   |
|                                           |        |        |       |         |         | 7        | 6         | 7374.2927                     | -0.2                   |
|                                           |        |        |       |         |         | 6        | 5         | 7374.9671                     | -1.2                   |
| 6                                         | 1      | 6      | 5     | 1       | 5       | 8        | 7         | 7312.7647                     | 0.5                    |
|                                           |        |        |       |         |         | 7        | 6         | 7312.6946                     | -3.9                   |
|                                           |        |        |       |         |         | 6        | 5         | 7312.3285                     | -1.6                   |
| 6                                         | 1      | 5      | 5     | 1       | 4       | 5        | 4         | 7312.3285                     | -2.6                   |
|                                           |        |        |       |         |         | 8        | 7         | 7448.8759                     | -1.6                   |
|                                           |        |        |       |         |         | 7        | 6         | 7448.8077                     | -0.8                   |
| 7                                         | 0      | 7      | 6     | 0       | 6       | 6        | 5         | 7449.4208                     | -1.2                   |
|                                           |        |        |       |         |         | 9        | 8         | 8599.9979                     | -3.5                   |
|                                           |        |        |       |         |         | 8        | 7         | 8599.4547                     | 0.3                    |
| 7                                         | 1      | 7      | 6     | 1       | 6       | 7        | 6         | 8599.6147                     | -0.3                   |
|                                           |        |        |       |         |         | 6        | 5         | 8600.0883                     | -0.5                   |
|                                           |        |        |       |         |         | 9        | 8         | 8530.5157                     | -0.1                   |
| 7                                         | 1      | 6      | 6     | 1       | 5       | 8        | 7         | 8530.4391                     | 13.9                   |
|                                           |        |        |       |         |         | 7        | 6         | 8530.1490                     | -3.2                   |
|                                           |        |        |       |         |         | 6        | 5         | 8530.2202                     | -1.4                   |
| 7                                         | 1      | 6      | 6     | 1       | 5       | 9        | 8         | 8689.3332                     | 1.6                    |
|                                           |        |        |       |         |         | 8        | 7         | 8689.2235                     | -1.7                   |
|                                           |        |        |       |         |         | 7        | 6         | 8689.6674                     | -0.8                   |
| 8                                         | 0      | 8      | 7     | 0       | 7       | 10       | 9         | 9823.7440                     | 3.0                    |
|                                           |        |        |       |         |         | 9        | 8         | 9823.1479                     | -1.6                   |
|                                           |        |        |       |         |         | 8        | 7         | 9823.2722                     | 1.0                    |
| 8                                         | 1      | 8      | 7     | 1       | 7       | 10       | 9         | 9747.8301                     | -1.7                   |
|                                           |        |        |       |         |         | 9        | 8         | 9747.7151                     | -0.6                   |
|                                           |        |        |       |         |         | 8        | 7         | 9929.2336                     | 4.2                    |
|                                           |        |        |       |         |         | 7        | 6         | 9929.0887                     | 0.8                    |



**Table S9.** Experimental transition frequencies ( $\nu$ , MHz) and observed minus calculated values ( $\Delta\nu$ , kHz) of isomer III of furan-CF<sub>3</sub><sup>35</sup>Cl.

| Isomer III |        |        |       |         |         |          |           |                               |                        |
|------------|--------|--------|-------|---------|---------|----------|-----------|-------------------------------|------------------------|
| $J'$       | $K_a'$ | $K_c'$ | $J''$ | $K_a''$ | $K_c''$ | $F'+1/2$ | $F''+1/2$ | $\nu_{\text{obs}}/\text{MHz}$ | $\Delta\nu/\text{kHz}$ |
| 7          | 1      | 6      | 6     | 1       | 5       | 9        | 8         | 6351.5825                     | 2.4                    |
|            |        |        |       |         |         | 8        | 7         | 6351.2528                     | -5.2                   |
|            |        |        |       |         |         | 7        | 6         | 6351.7722                     | -4.9                   |
|            |        |        |       |         |         | 6        | 5         | 6351.0966                     | 1.5                    |
| 8          | 0      | 8      | 7     | 0       | 7       | 10       | 9         | 7250.9242                     | 7.8                    |
|            |        |        |       |         |         | 9        | 8         | 7250.9242                     | 8.5                    |
|            |        |        |       |         |         | 8        | 7         | 7250.4854                     | 14.8                   |
|            |        |        |       |         |         | 7        | 6         | 7250.4854                     | 13.3                   |
| 8          | 1      | 8      | 7     | 1       | 7       | 10       | 9         | 7243.9718                     | 3.1                    |
|            |        |        |       |         |         | 9        | 8         | 7243.7529                     | -1.2                   |
|            |        |        |       |         |         | 8        | 7         | 7243.3733                     | 0.7                    |
|            |        |        |       |         |         | 7        | 6         | 7243.5675                     | -8.2                   |
| 8          | 1      | 7      | 7     | 1       | 6       | 10       | 9         | 7258.6770                     | 1.7                    |
|            |        |        |       |         |         | 9        | 8         | 7258.4560                     | -4.6                   |
|            |        |        |       |         |         | 8        | 7         | 7258.0780                     | -1.0                   |
|            |        |        |       |         |         | 7        | 6         | 7258.2878                     | -3.4                   |
| 9          | 0      | 9      | 8     | 0       | 8       | 11       | 10        | 8157.0146                     | -15.0                  |
|            |        |        |       |         |         | 10       | 9         | 8157.0146                     | -14.5                  |
|            |        |        |       |         |         | 9        | 8         | 8156.6874                     | -2.8                   |
|            |        |        |       |         |         | 8        | 7         | 8156.6874                     | -3.8                   |
| 9          | 1      | 9      | 8     | 1       | 8       | 11       | 10        | 8419.2241                     | 7.8                    |
|            |        |        |       |         |         | 10       | 9         | 8149.0665                     | 0.3                    |
|            |        |        |       |         |         | 9        | 8         | 8148.7592                     | 1.6                    |
|            |        |        |       |         |         | 8        | 7         | 8148.9088                     | 2.5                    |
| 9          | 1      | 8      | 8     | 1       | 7       | 11       | 10        | 8165.7392                     | 0.9                    |
|            |        |        |       |         |         | 10       | 9         | 8165.5862                     | -1.9                   |
|            |        |        |       |         |         | 9        | 8         | 8165.2818                     | 2.2                    |
|            |        |        |       |         |         | 8        | 7         | 8165.4288                     | 0.5                    |
| 10         | 0      | 10     | 9     | 0       | 9       | 12       | 11        | 9063.0893                     | 7.9                    |
|            |        |        |       |         |         | 11       | 10        | 9063.0893                     | 8.3                    |
|            |        |        |       |         |         | 10       | 9         | 9062.7912                     | -10.2                  |
|            |        |        |       |         |         | 9        | 8         | 9062.7912                     | -10.9                  |
| 10         | 1      | 10     | 9     | 1       | 9       | 12       | 11        | 9054.4195                     | -2.9                   |
|            |        |        |       |         |         | 11       | 10        | 9054.3128                     | -0.4                   |
|            |        |        |       |         |         | 10       | 9         | 9054.0617                     | 2.3                    |
|            |        |        |       |         |         | 9        | 8         | 9054.1686                     | 1.0                    |
| 10         | 1      | 9      | 9     | 1       | 8       | 12       | 11        | 9072.7522                     | 0.3                    |
|            |        |        |       |         |         | 11       | 10        | 9072.6508                     | 2.0                    |
|            |        |        |       |         |         | 10       | 9         | 9072.3951                     | 6.3                    |
|            |        |        |       |         |         | 9        | 8         | 9072.5087                     | 11.7                   |
| 11         | 0      | 11     | 10    | 0       | 10      | 13       | 12        | 9969.0509                     | -10.4                  |
|            |        |        |       |         |         | 12       | 11        | 9969.0509                     | -10.1                  |
|            |        |        |       |         |         | 11       | 10        | 9968.8280                     | -3.3                   |
|            |        |        |       |         |         | 10       | 9         | 9968.8280                     | -3.8                   |

|    |   |    |    |   |    |    |    |            |       |
|----|---|----|----|---|----|----|----|------------|-------|
| 11 | 1 | 11 | 10 | 1 | 10 | 13 | 12 | 9959.5795  | 4.3   |
|    |   |    |    |   |    | 12 | 11 | 9959.4941  | 0.7   |
|    |   |    |    |   |    | 11 | 10 | 9959.2830  | 1.9   |
|    |   |    |    |   |    | 10 | 9  | 9959.3672  | 4.9   |
| 11 | 1 | 10 | 10 | 1 | 9  | 13 | 12 | 9979.7051  | 2.0   |
|    |   |    |    |   |    | 12 | 11 | 9979.6141  | -7.1  |
|    |   |    |    |   |    | 11 | 10 | 9979.4107  | 1.8   |
|    |   |    |    |   |    | 10 | 9  | 9979.4896  | -0.4  |
| 12 | 0 | 12 | 11 | 0 | 11 | 14 | 13 | 10874.9414 | -18.8 |
|    |   |    |    |   |    | 13 | 12 | 10874.9414 | -18.6 |
|    |   |    |    |   |    | 12 | 11 | 10874.7567 | -11.1 |
|    |   |    |    |   |    | 11 | 10 | 10874.7567 | -11.5 |
| 12 | 1 | 12 | 11 | 1 | 11 | 14 | 13 | 10864.6663 | 1.4   |
|    |   |    |    |   |    | 13 | 12 | 10864.6033 | 1.4   |
|    |   |    |    |   |    | 12 | 11 | 10864.4188 | -3.1  |
|    |   |    |    |   |    | 11 | 10 | 10864.4848 | 0.3   |
| 12 | 1 | 11 | 11 | 1 | 10 | 14 | 13 | 10886.5868 | 5.6   |
|    |   |    |    |   |    | 13 | 12 | 10886.5167 | -1.5  |
|    |   |    |    |   |    | 12 | 11 | 10886.3407 | 2.4   |
|    |   |    |    |   |    | 11 | 10 | 10886.3987 | -2.0  |
| 13 | 0 | 13 | 12 | 0 | 12 | 15 | 14 | 11780.7648 | -4.6  |
|    |   |    |    |   |    | 14 | 13 | 11780.7648 | -4.4  |
|    |   |    |    |   |    | 13 | 12 | 11780.6035 | -2.5  |
|    |   |    |    |   |    | 12 | 11 | 11780.6035 | -2.8  |
| 13 | 1 | 13 | 12 | 1 | 12 | 15 | 14 | 11769.6773 | -5.5  |
|    |   |    |    |   |    | 14 | 13 | 11769.6386 | 5.1   |
|    |   |    |    |   |    | 13 | 12 | 11769.4792 | 0.0   |
|    |   |    |    |   |    | 12 | 11 | 11769.5248 | -3.4  |
| 13 | 1 | 12 | 12 | 1 | 11 | 15 | 14 | 11793.3787 | 1.8   |
|    |   |    |    |   |    | 14 | 13 | 11793.3258 | -1.6  |
|    |   |    |    |   |    | 13 | 12 | 11793.1738 | 0.6   |
|    |   |    |    |   |    | 12 | 11 | 11793.2270 | 4.7   |
| 14 | 0 | 14 | 13 | 0 | 13 | 16 | 15 | 12686.4987 | 17.8  |
|    |   |    |    |   |    | 15 | 14 | 12686.4984 | 18.0  |
|    |   |    |    |   |    | 14 | 13 | 12686.3551 | 15.0  |
|    |   |    |    |   |    | 13 | 12 | 12686.3551 | 14.8  |
| 14 | 1 | 14 | 13 | 1 | 13 | 16 | 15 | 12674.6201 | -1.6  |
|    |   |    |    |   |    | 15 | 14 | 12674.5849 | 2.7   |
|    |   |    |    |   |    | 14 | 13 | 12674.4488 | 0.3   |
|    |   |    |    |   |    | 13 | 12 | 12674.4806 | -7.1  |
| 14 | 1 | 13 | 13 | 1 | 12 | 16 | 15 | 12700.0801 | -1.4  |
|    |   |    |    |   |    | 15 | 14 | 12700.0457 | 3.6   |
|    |   |    |    |   |    | 14 | 13 | 12699.9099 | 1.6   |
|    |   |    |    |   |    | 13 | 12 | 12699.9494 | 1.8   |
| 15 | 0 | 15 | 14 | 0 | 14 | 17 | 16 | 13592.0969 | 11.3  |
|    |   |    |    |   |    | 16 | 15 | 13592.0969 | 11.4  |
|    |   |    |    |   |    | 15 | 14 | 13591.9628 | -0.7  |
|    |   |    |    |   |    | 14 | 13 | 13591.9628 | -0.8  |
| 15 | 1 | 15 | 14 | 1 | 14 | 17 | 16 | 13579.4748 | 0.7   |
|    |   |    |    |   |    | 16 | 15 | 13579.4353 | -6.6  |

|    |   |    |    |   |    |    |    |            |       |
|----|---|----|----|---|----|----|----|------------|-------|
|    |   |    |    |   |    | 15 | 14 | 13579.3254 | 0.4   |
|    |   |    |    |   |    | 14 | 13 | 13579.3571 | 0.2   |
| 15 | 1 | 14 | 14 | 1 | 13 | 17 | 16 | 13606.6742 | -12.9 |
|    |   |    |    |   |    | 16 | 15 | 13606.6500 | -5.0  |
|    |   |    |    |   |    | 15 | 14 | 13606.5389 | 0.9   |
|    |   |    |    |   |    | 14 | 13 | 13606.5684 | -1.5  |

**6. Table S10. NBO results calculated at the B3LYP-D3(BJ)/aug-cc-pVTZ level of isomers I and III in  $\text{kJ}\cdot\text{mol}^{-1}$ .**

| Isomer I                                                                          |                       |             | Isomer III                                                                        |                         |             |
|-----------------------------------------------------------------------------------|-----------------------|-------------|-----------------------------------------------------------------------------------|-------------------------|-------------|
| Donor NBO                                                                         | Acceptor NBO          | E(2)        | Donor NBO                                                                         | Acceptor NBO            | E(2)        |
| From furan to $\text{CF}_3\text{Cl}$                                              |                       |             | From furan to $\text{CF}_3\text{Cl}$                                              |                         |             |
| <b>LP(2) O1</b>                                                                   | <b>BD*(1) C7 – F9</b> | <b>0.33</b> | <b>BD(2) C2 – C3</b>                                                              | <b>BD*(1) C1 6 – C7</b> | <b>3.26</b> |
|                                                                                   |                       |             | BD(2) C2 – C3                                                                     | RY (1) C1 6             | 0.75        |
| From $\text{CF}_3\text{Cl}$ to furan                                              |                       |             | From $\text{CF}_3\text{Cl}$ to furan                                              |                         |             |
| <b>LP(3) C1 6</b>                                                                 | <b>BD*(2) C2 – C3</b> | <b>0.38</b> | <b>LP(3) C1 6</b>                                                                 | <b>BD*(2) C2 – C3</b>   | <b>0.92</b> |
| <b>LP(3) C1 6</b>                                                                 | <b>BD*(2) C4 – C5</b> | <b>0.38</b> | LP(3) C1 6                                                                        | BD*(2) C4 – C5          | 0.21        |
| <b>LP(3) C1 6</b>                                                                 | <b>BD*(1) O1 – C2</b> | <b>0.25</b> |                                                                                   |                         |             |
| <b>LP(3) C1 6</b>                                                                 | <b>BD*(1) O1 – C5</b> | <b>0.25</b> |                                                                                   |                         |             |
| LP(3) C1 6                                                                        | RY (8) O1             | 0.21        |                                                                                   |                         |             |
|  |                       |             |  |                         |             |
